# Supplementary material for: Genotyping-by-sequencing markers facilitate the identification of quantitative trait loci controlling resistance to Penicillium expansum in Malus sieversii
Source: PubMed Central journal article supplement (PMC5336245; doi:10.1371/journal.pone.0172949), 2017-03-03

**S1 Fig. Images of genetic linkage maps for 17 linkage groups of GMAL4593 population.**

Images illustrate maps for 'Royal Gala' (maternal parent, left), PI613981 (paternal parent, right) and combined GMAL4593 mapping population (center).

Anchor markers used to combine parental maps and connected with lines.

The genetic linkage maps were calculated using JoinMap4.1 software (Kyazma B.V., Wageningen, The Netherlands).

**LG 1**

**RG**

**4593**

**613981**

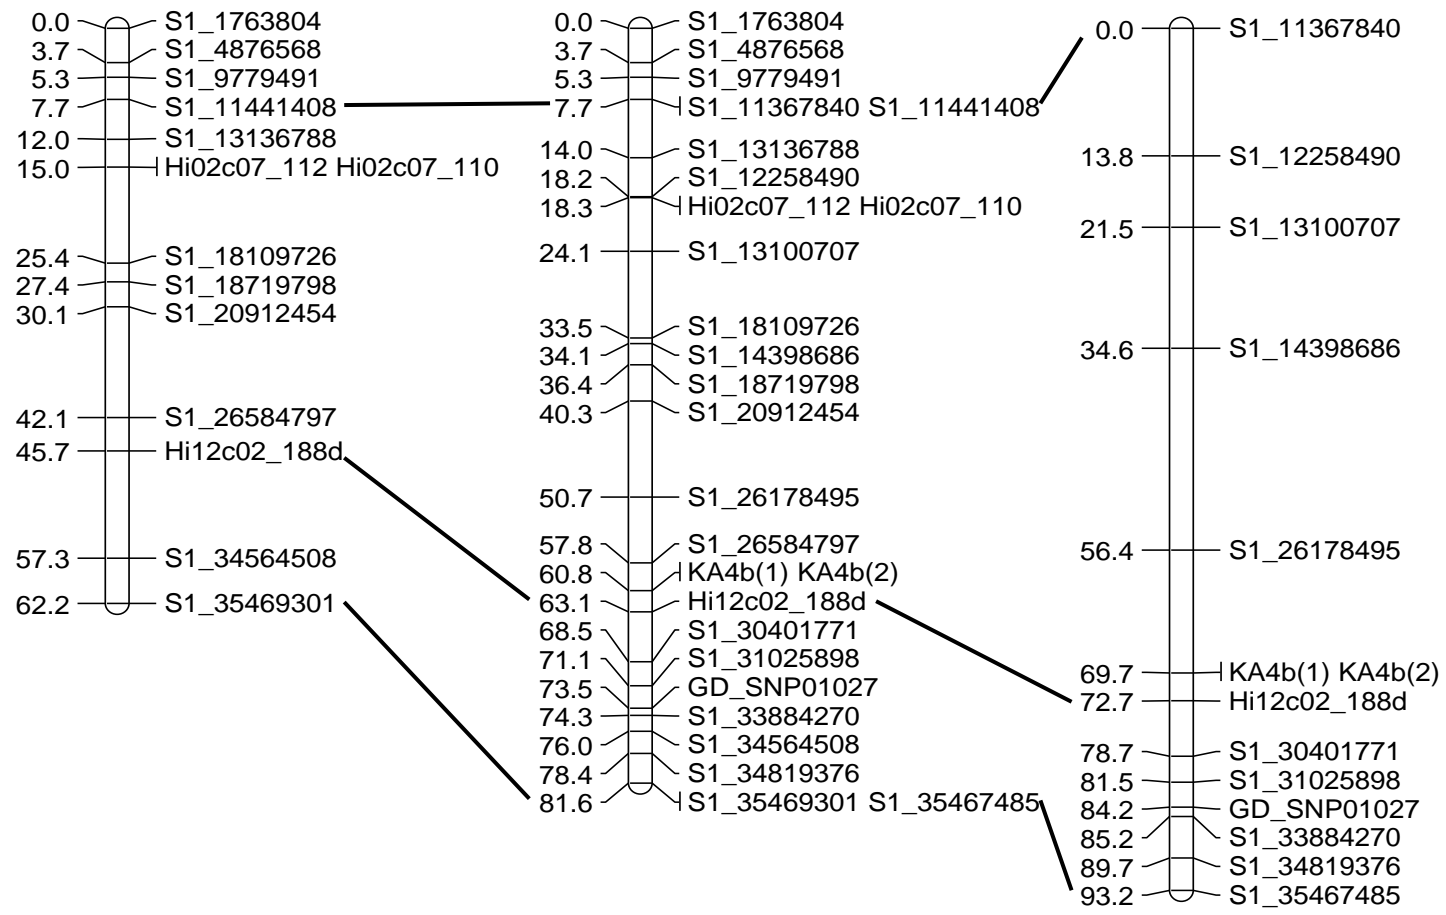

**LG 2**

**RG**

**4593**

**613981**

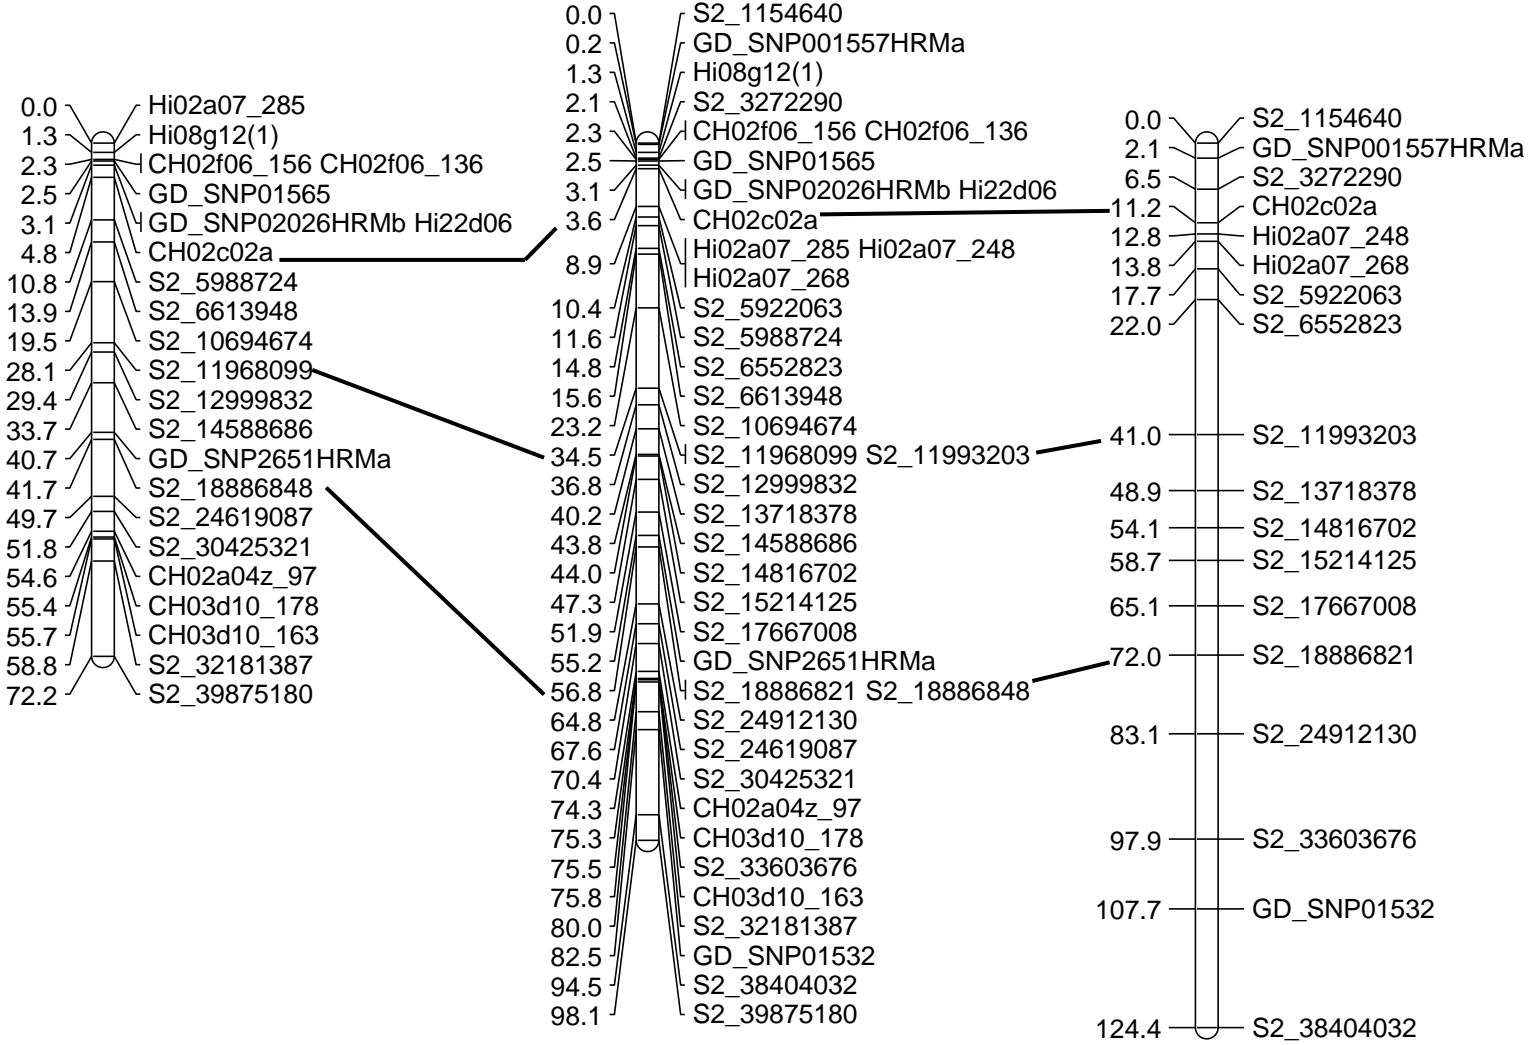

**LG 3**

**RG**

**4593**

**613981**

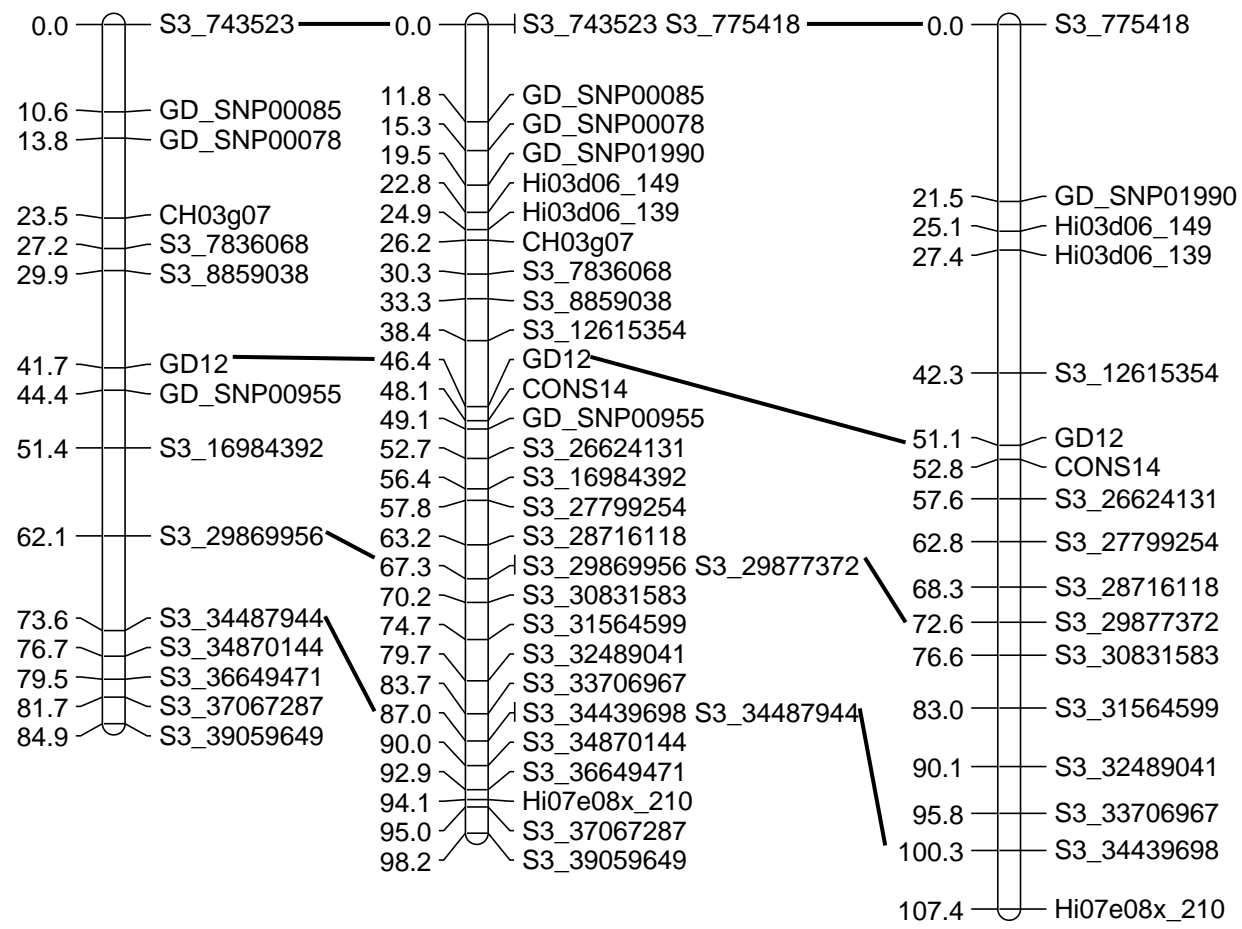

**LG 4**

**RG**

**4593**

**613981**

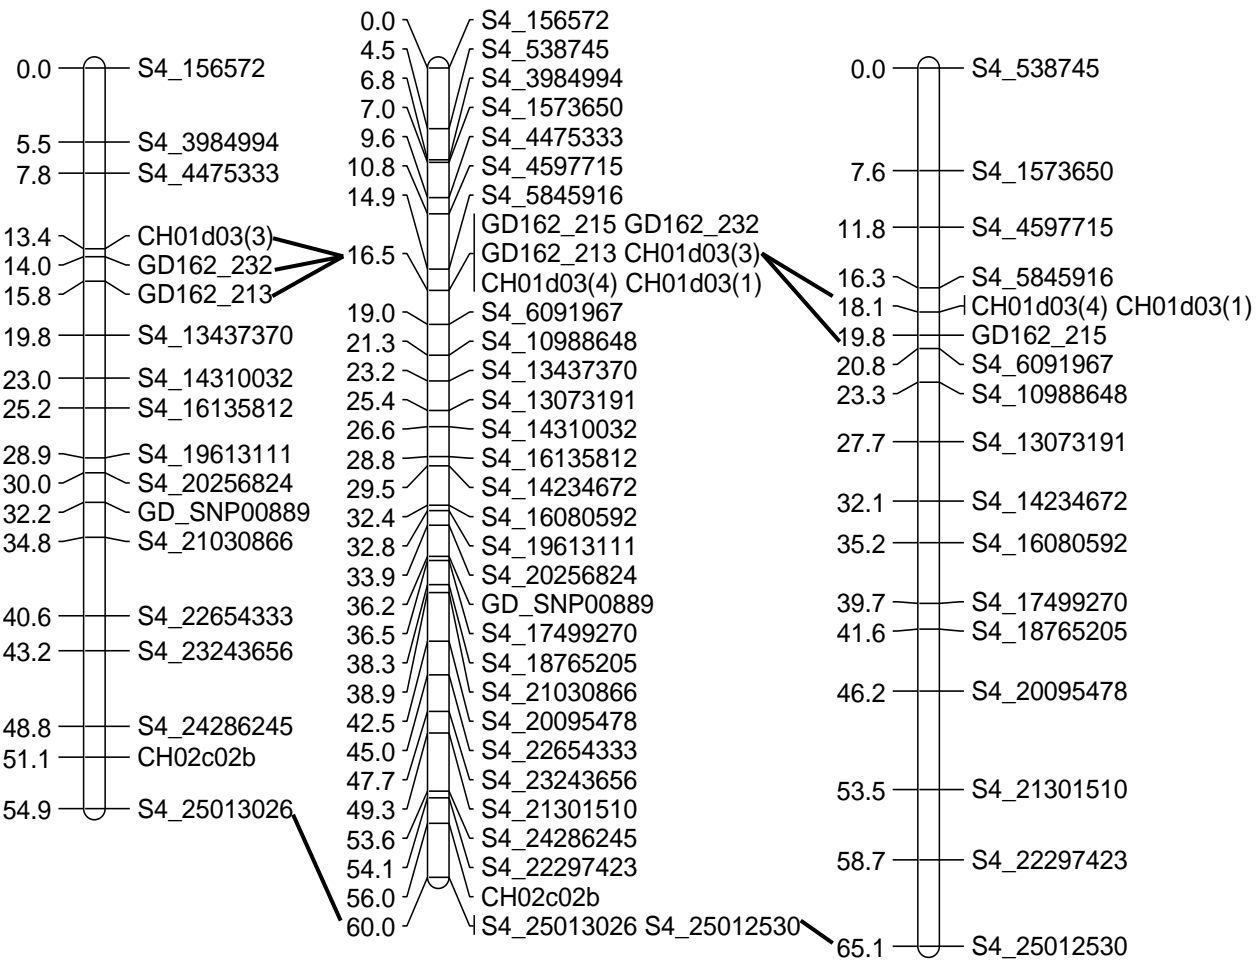

**LG 5**

**RG**

**4593**

**613981**

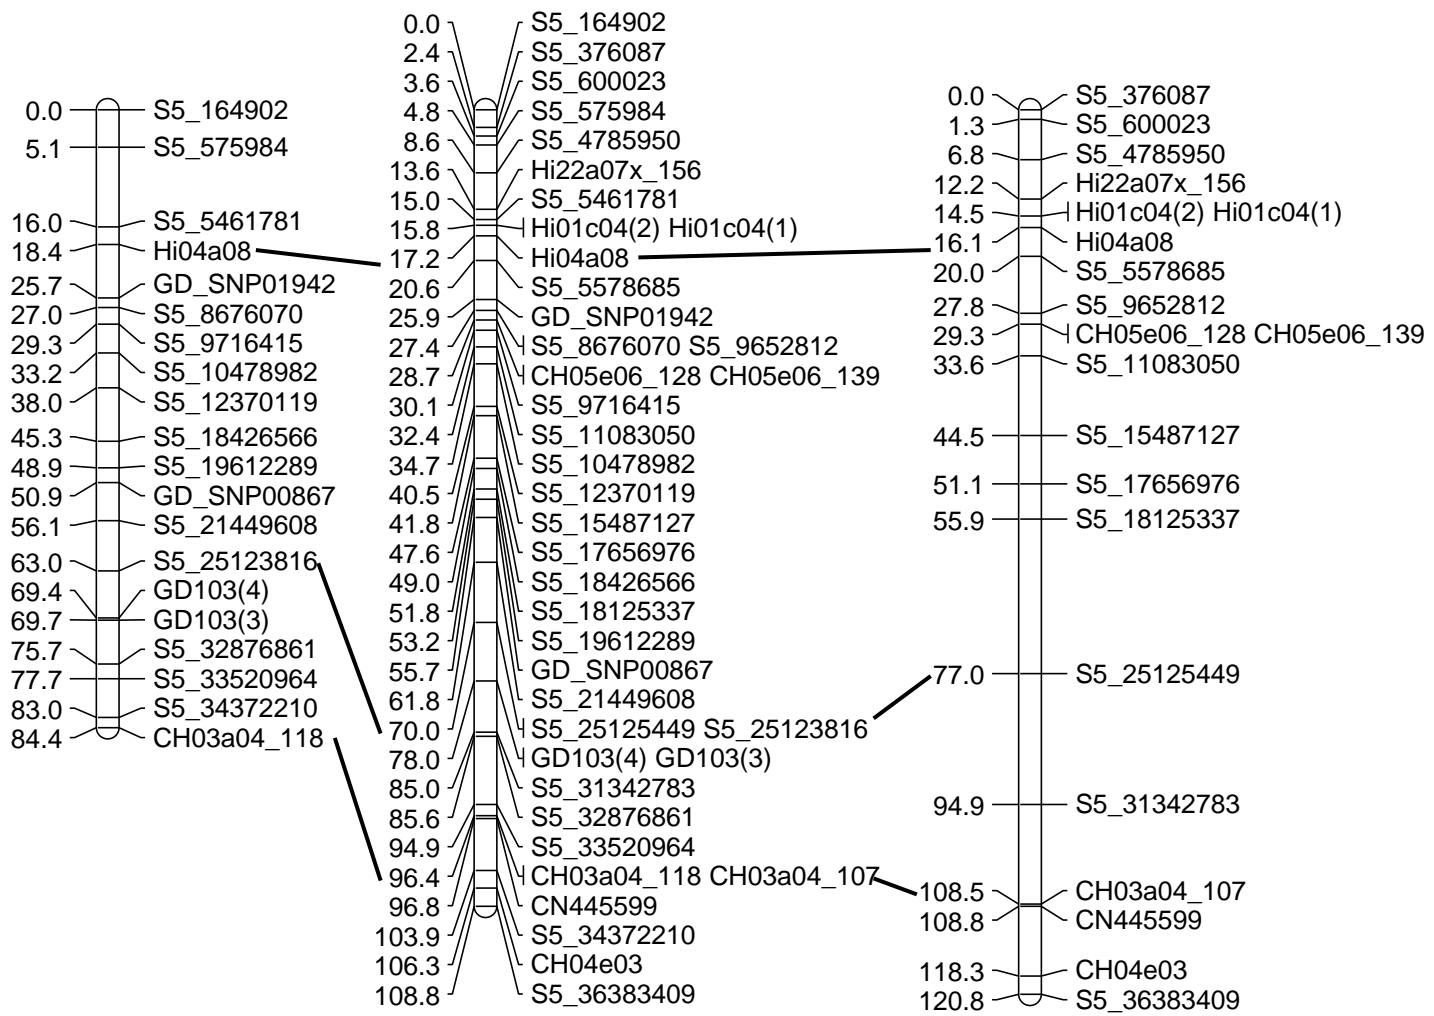

**LG 6**

**RG**

**4593**

**613981**

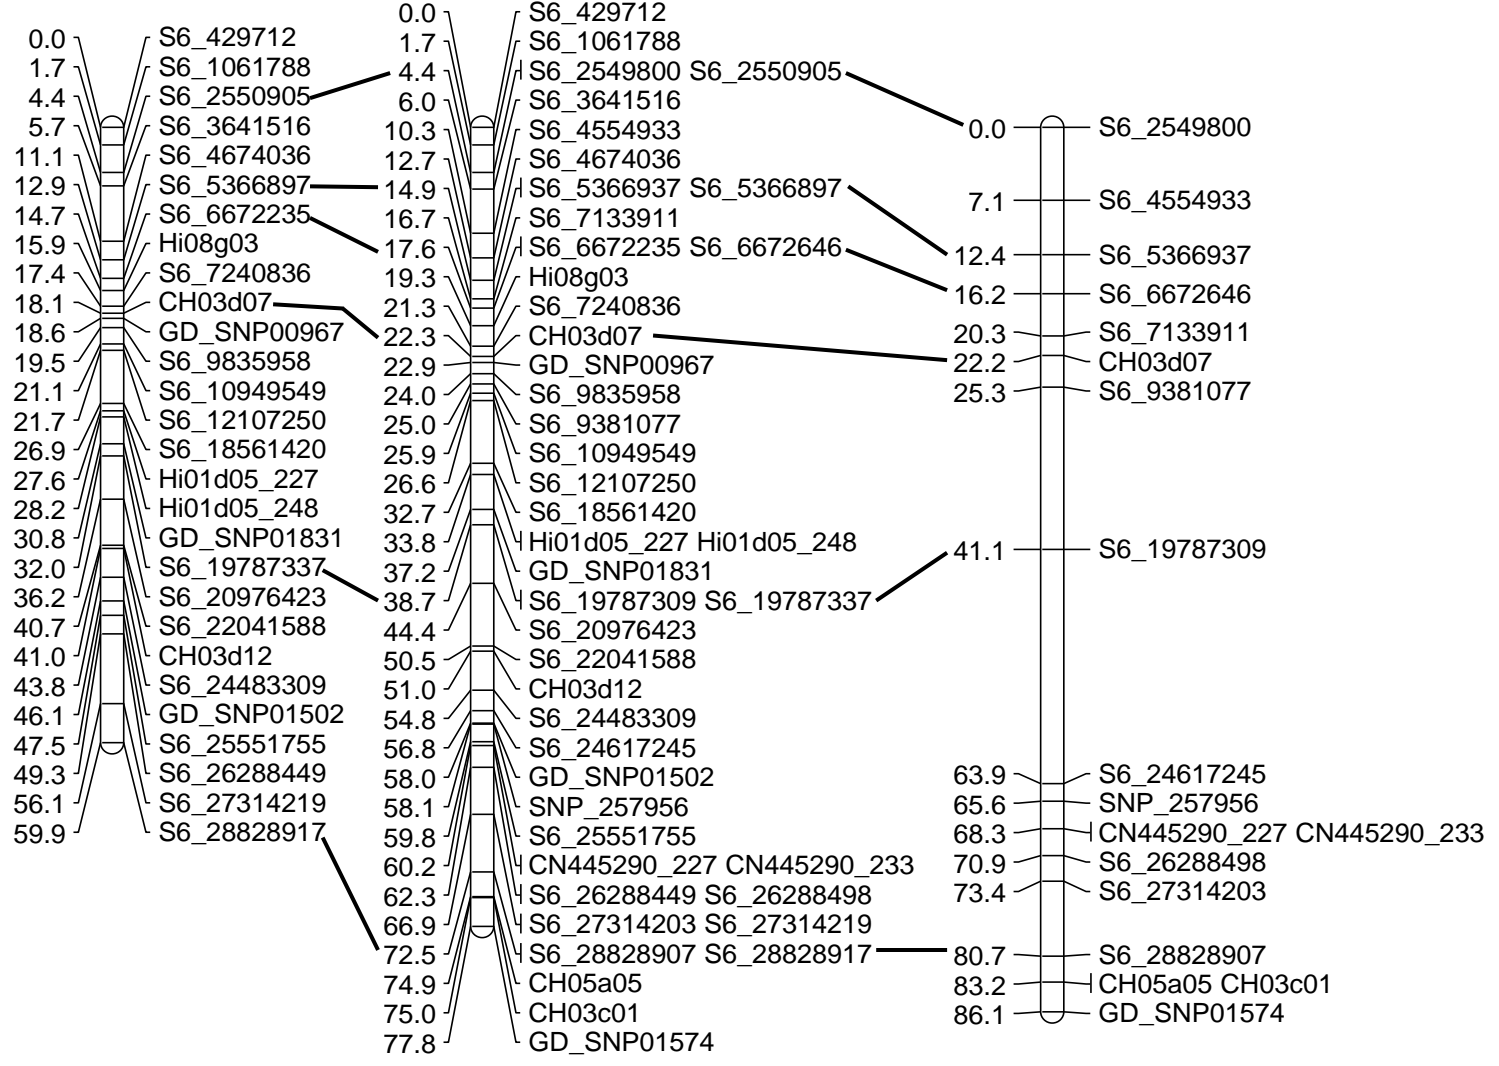

**LG 7**

**RG**

**4593**

**613981**

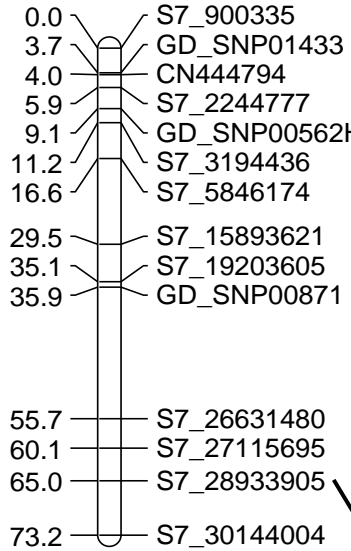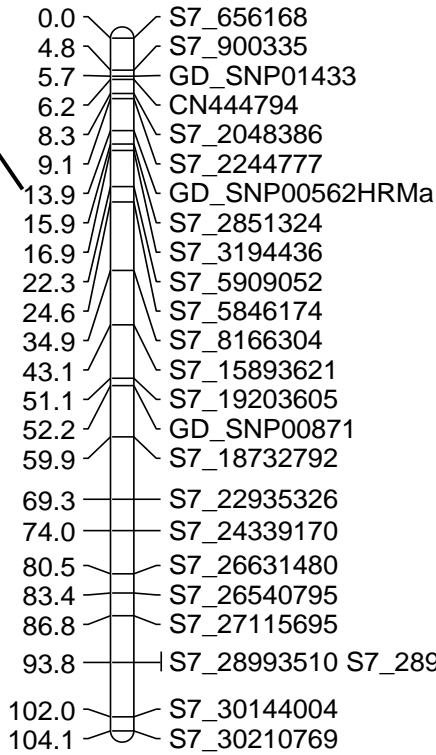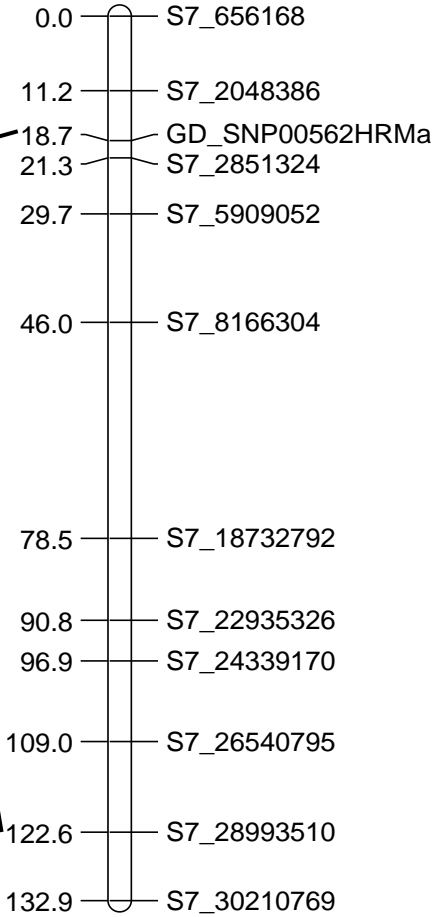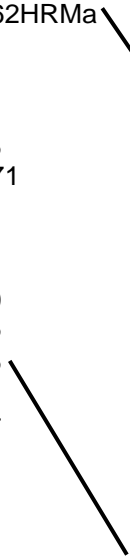



**LG 8**

**RG**

**4593**

**613981**

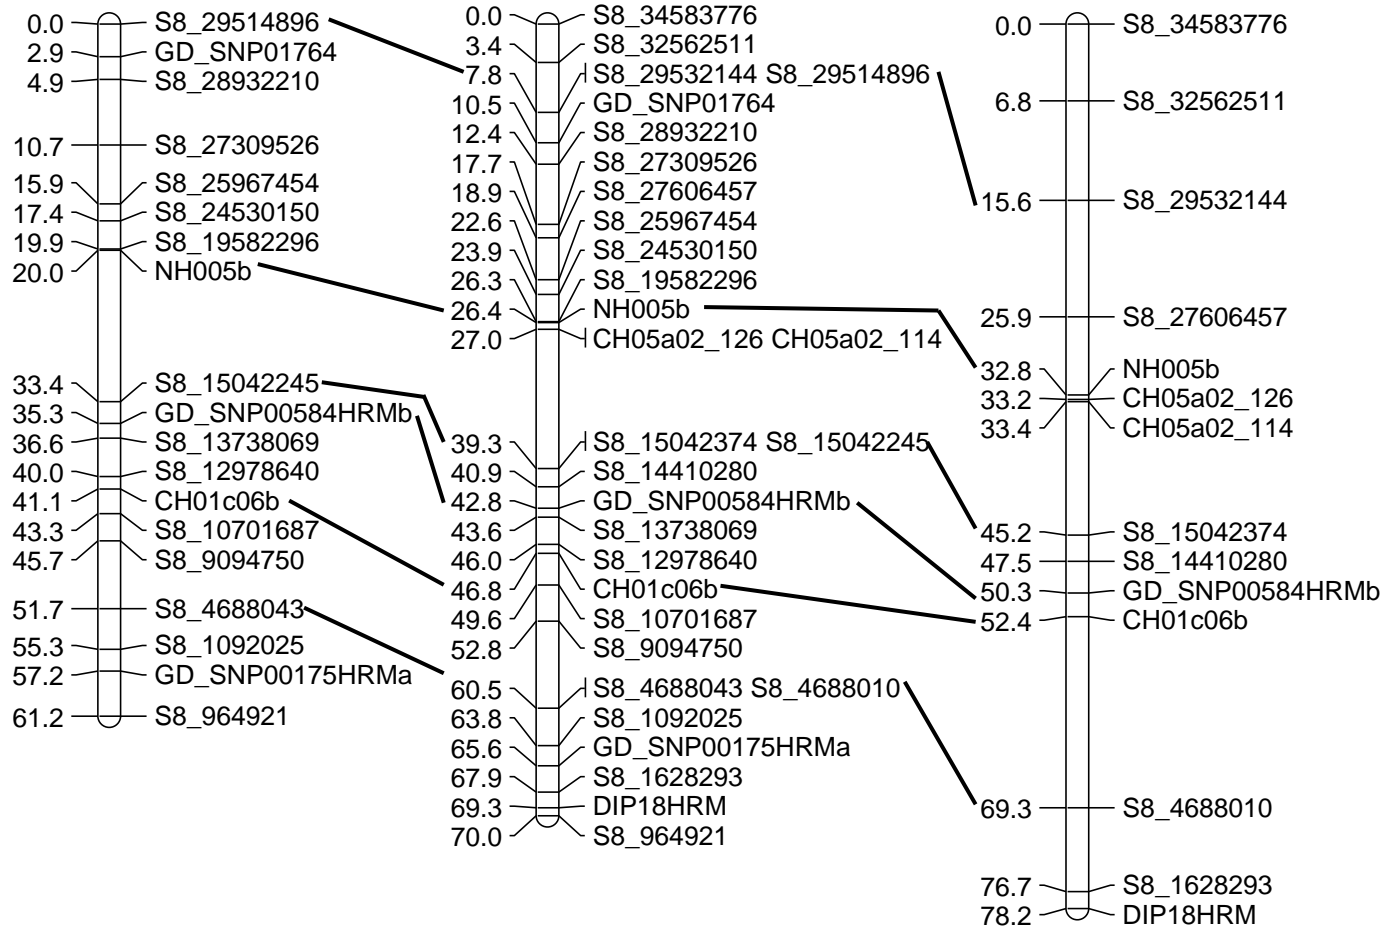

**LG 9**

**RG**

**4593**

**613981**

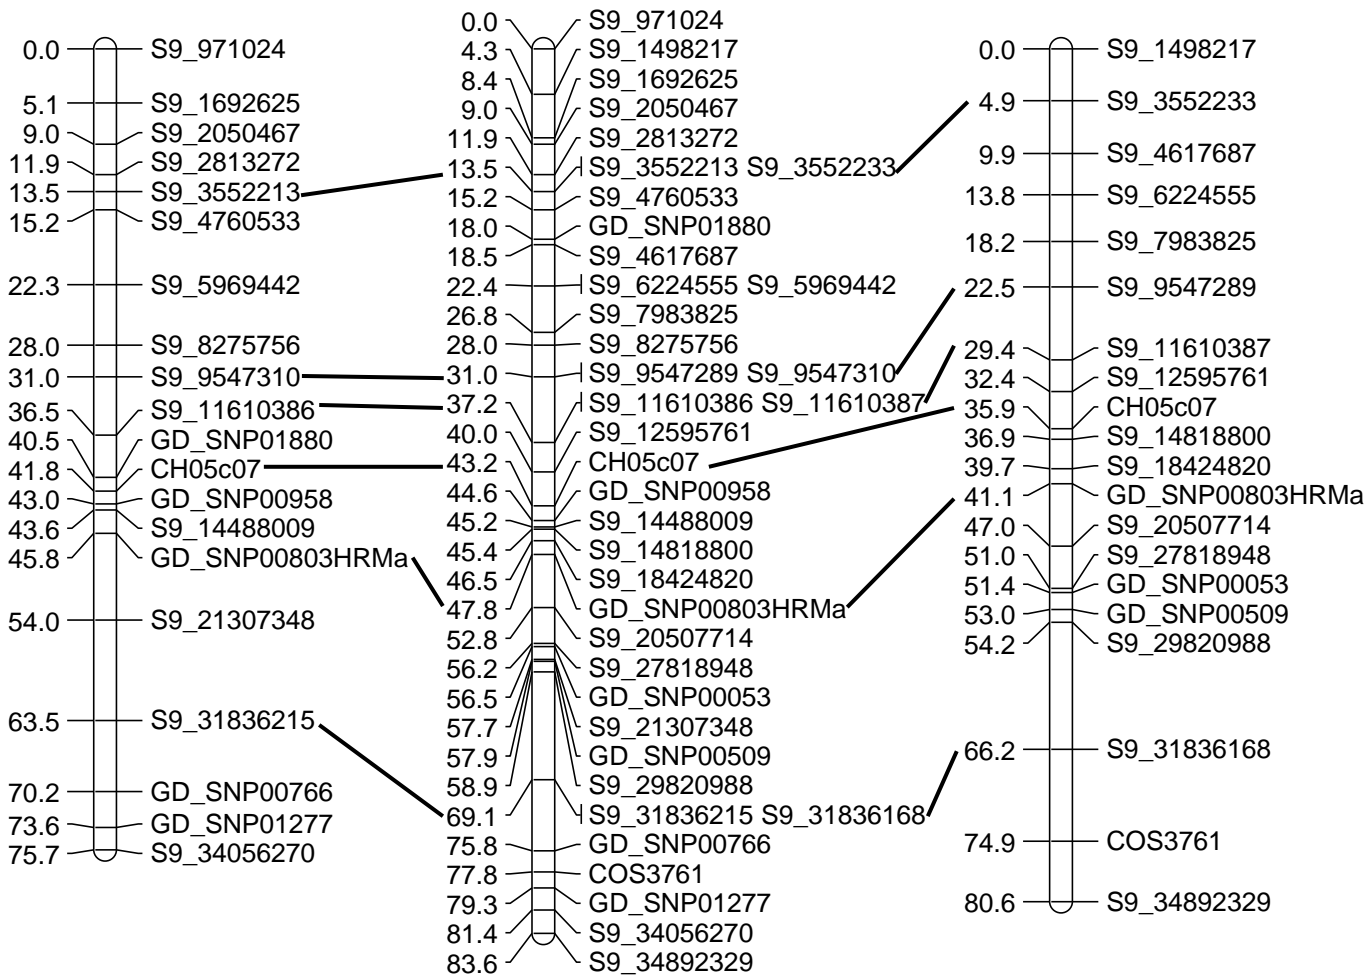

**LG 10**

**RG**

**4593**

**613981**

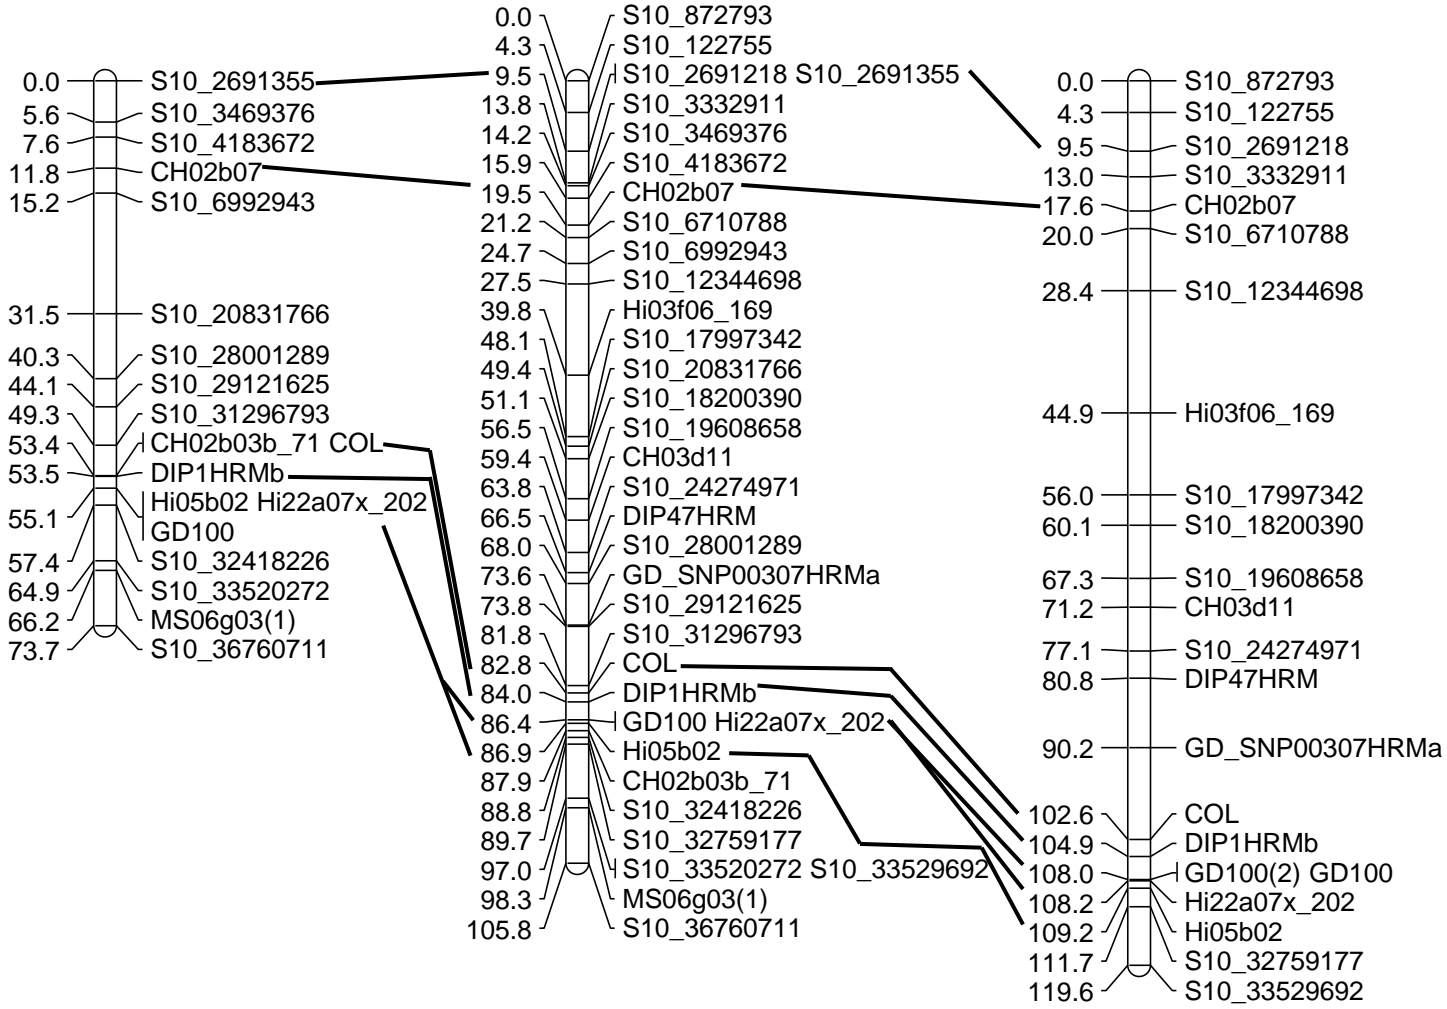

**LG 11**

**RG**

**4593**

**613981**

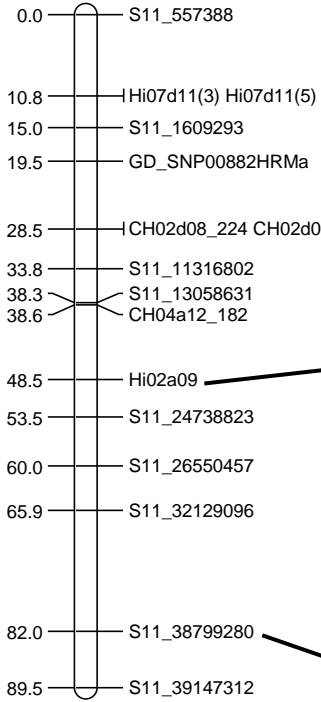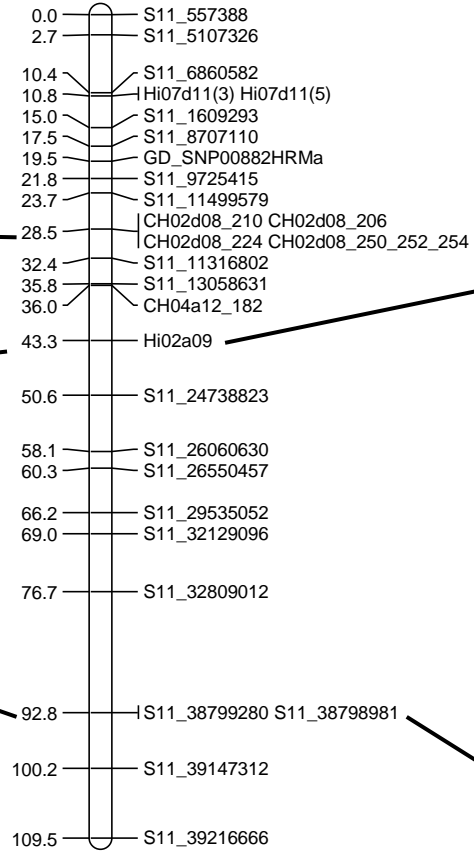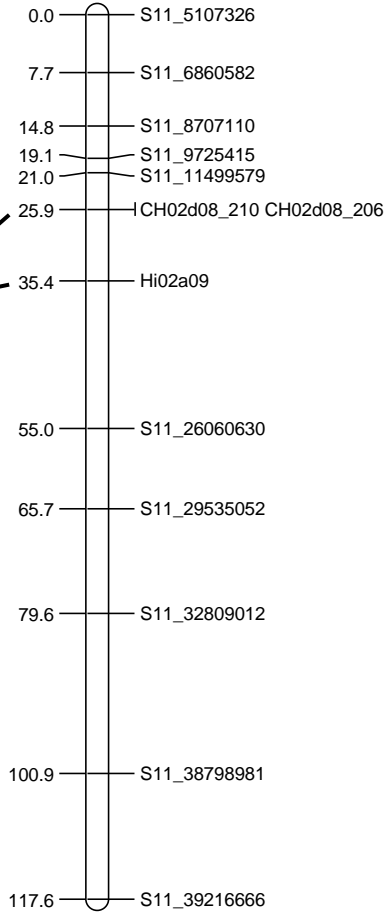

LG 12

RG

4593

613981

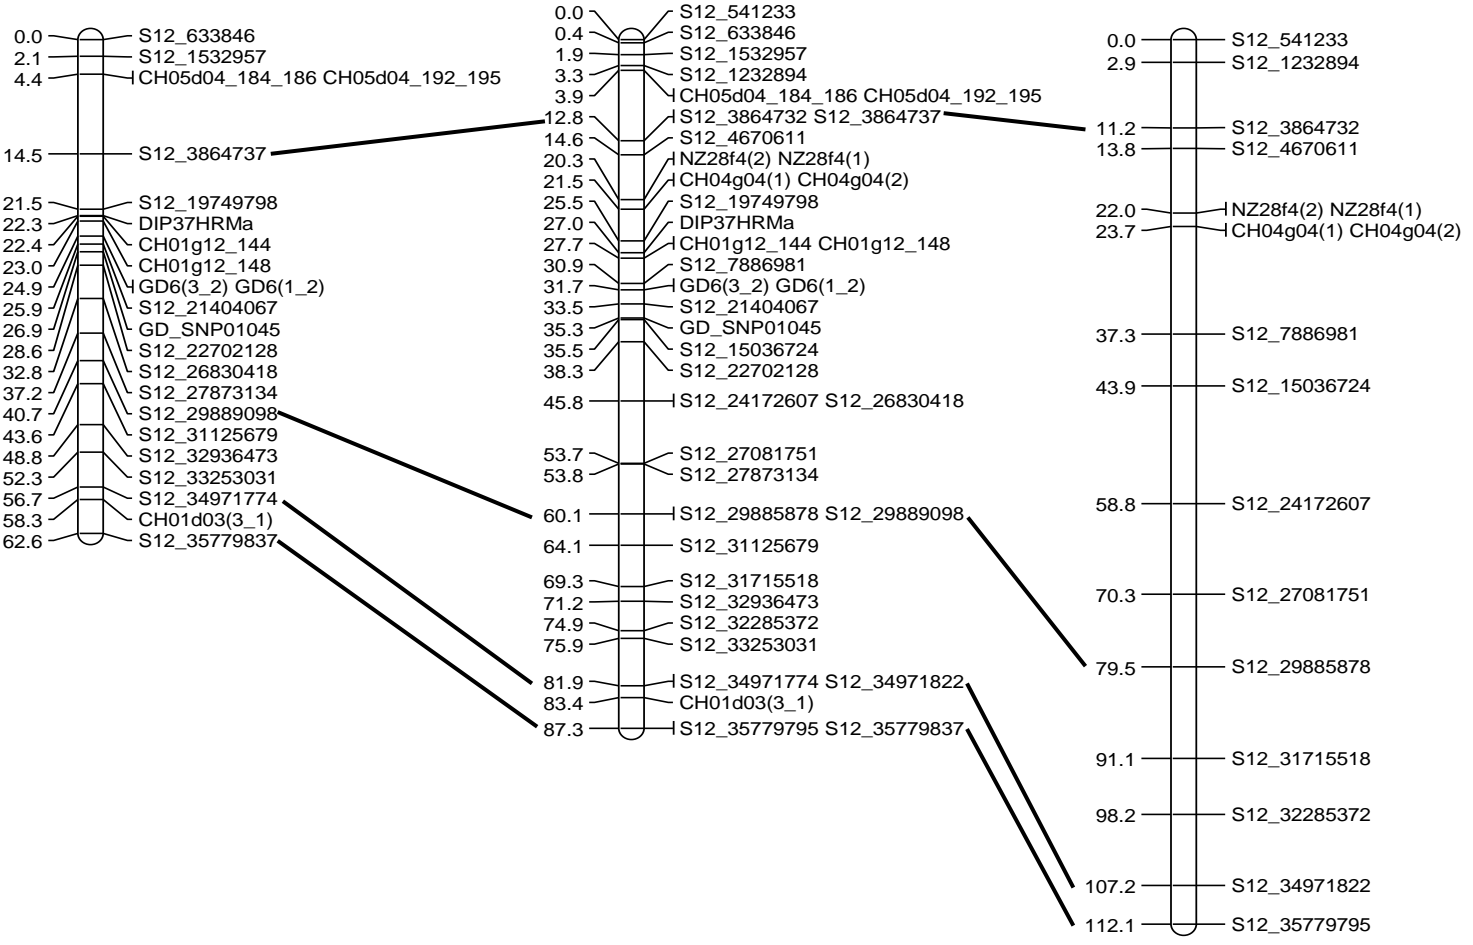

**LG 13**

**RG**

**4593**

**613981**

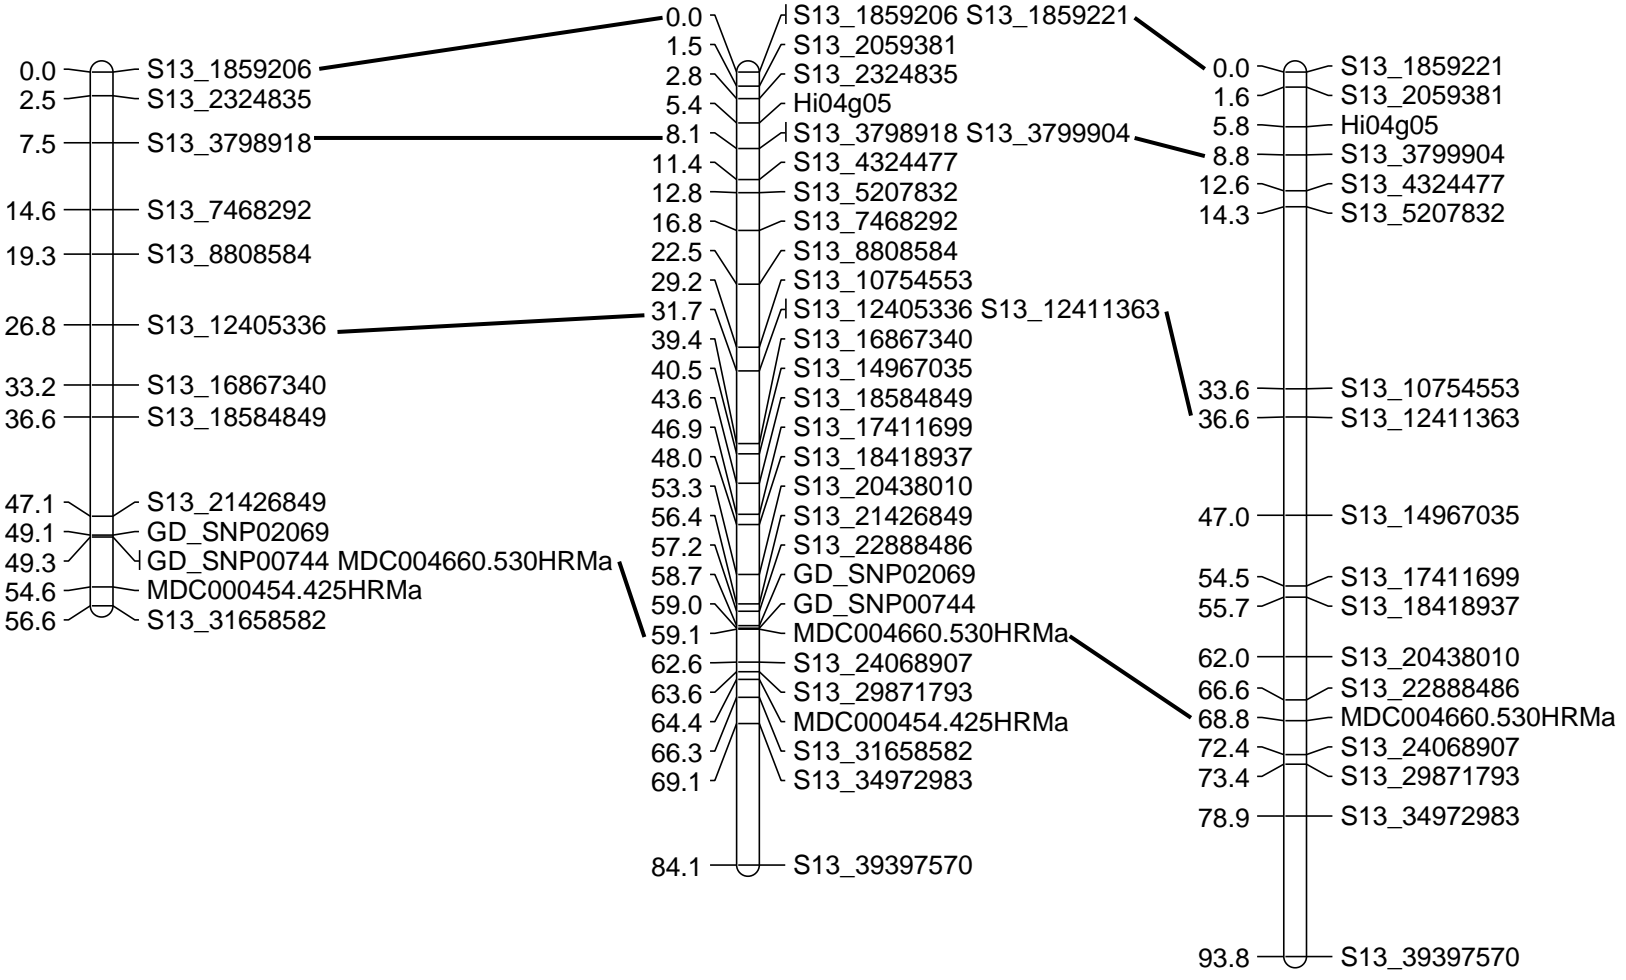

**LG 14**

**RG**

**4593**

**613981**

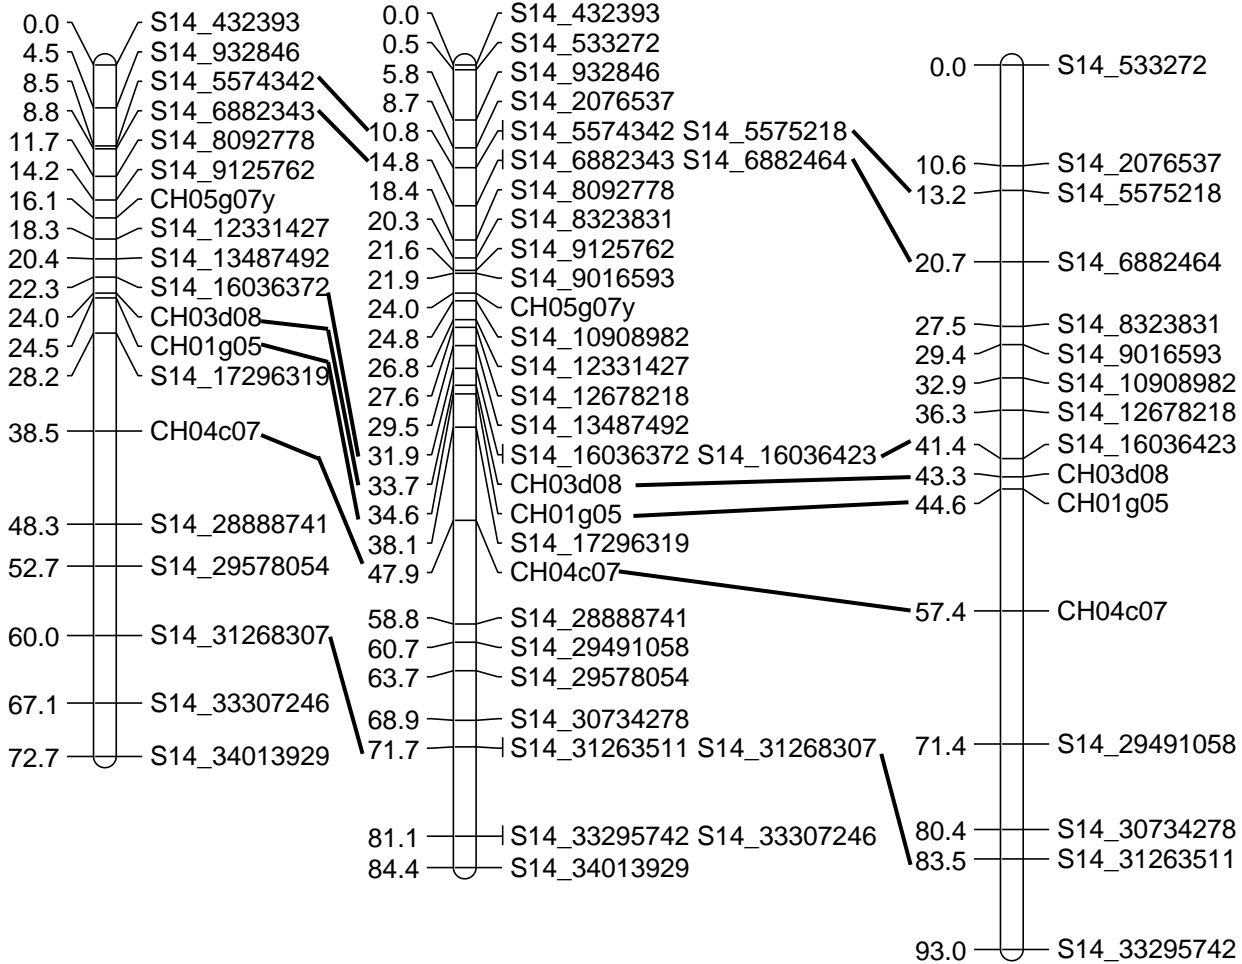

**LG 15**

**RG**

**4593**

**613981**

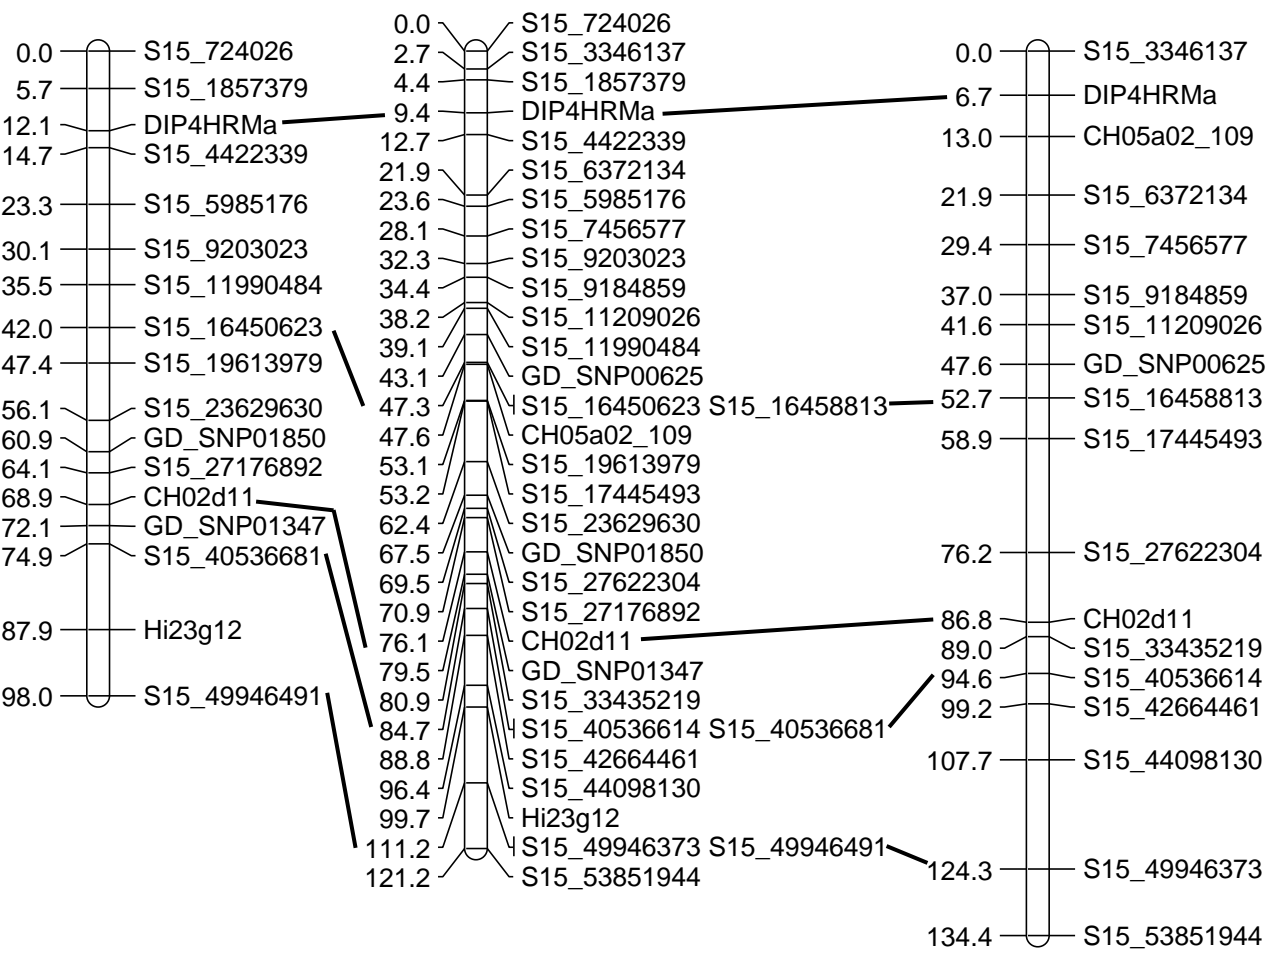



**LG 16**

**RG**

**4593**

**613981**

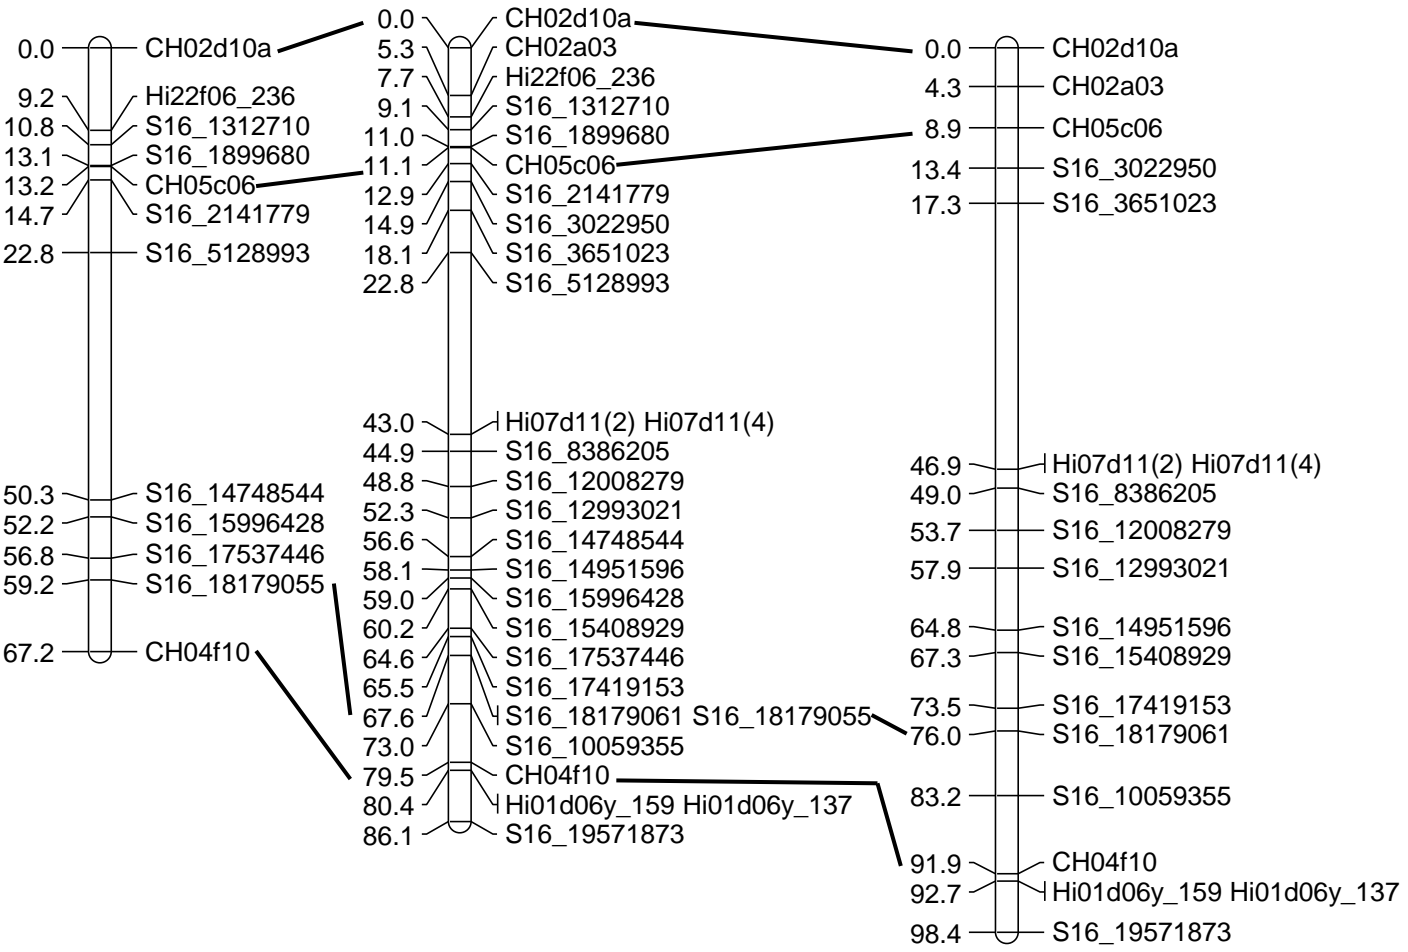

**LG 17**

**RG**

**4593**

**613981**

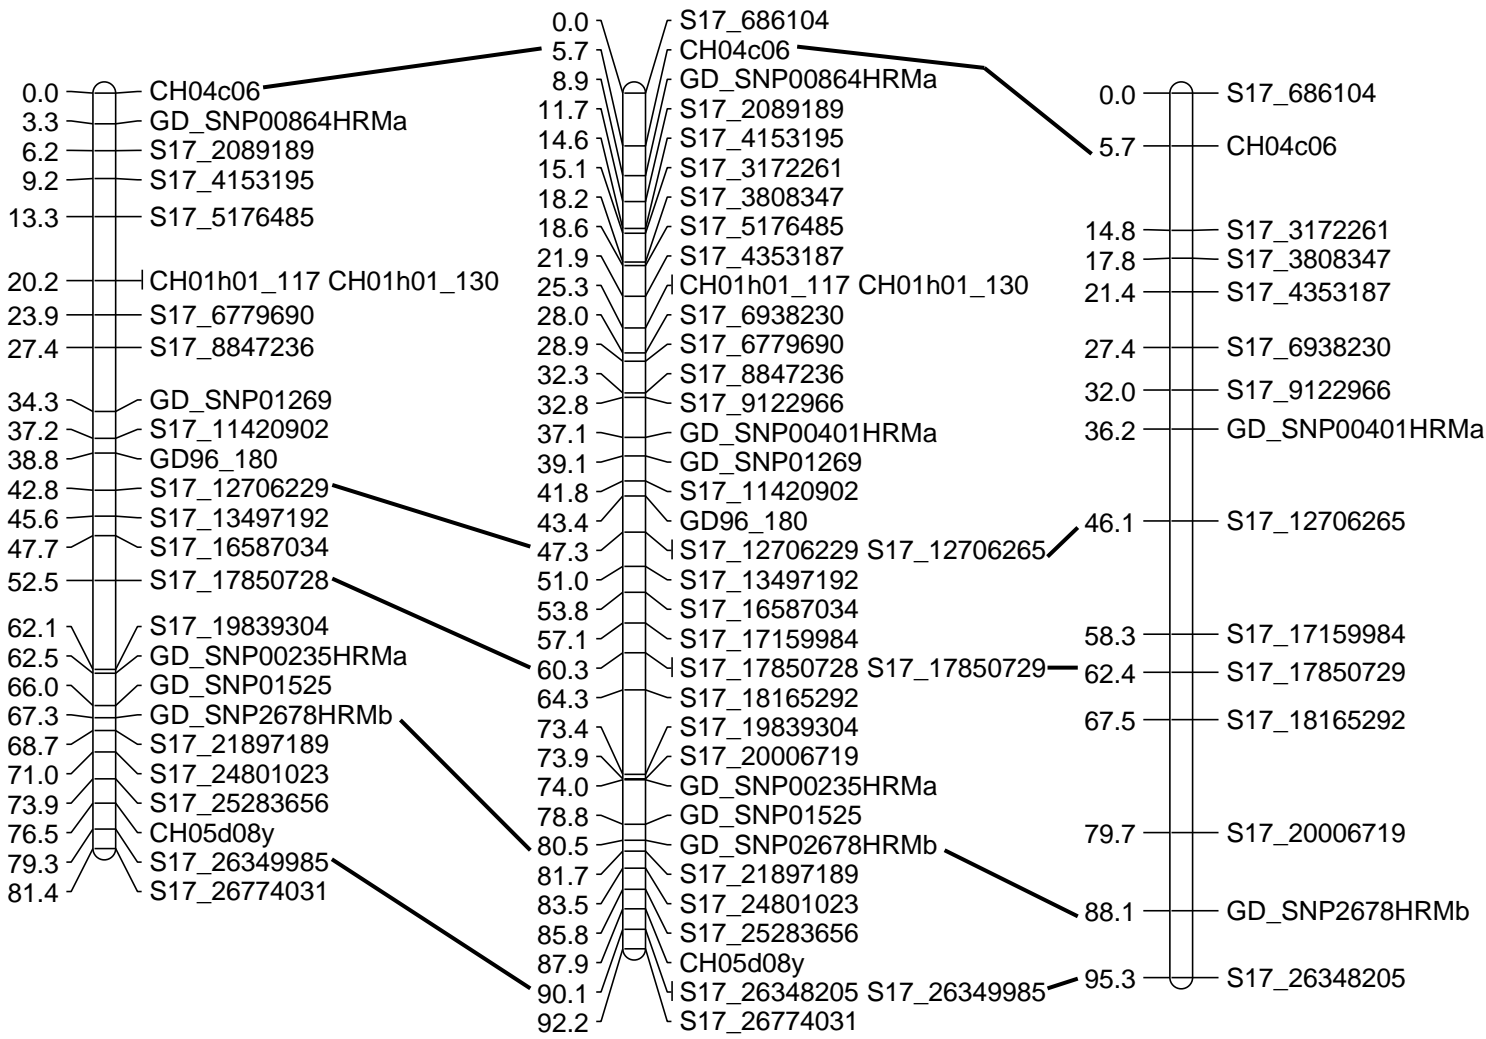

Supplement: pone.0172949.s001.pdf [file pone.0172949.s001.pdf]
