# Supplementary material for: Genotyping-by-sequencing markers facilitate the identification of quantitative trait loci controlling resistance to Penicillium expansum in Malus sieversii
Source: PubMed Central journal article supplement (PMC5336245; doi:10.1371/journal.pone.0172949), 2017-03-03

**S3 Fig. Effect of LG 10 qM-*Pe*10.1 marker allele genotypes on the least square mean (LSmean) of blue mold lesion diameter 7 dpi.**

**A:** The LSmean lesion diameter of PI613981 *GDsnp00307HRM* (red tones) and ‘Royal Gala’ *S10\_29121625* (blue tones) allele genotypes indicated that the *ll* allele of *S10\_29121625* was the primary contributor of resistance to qM-*Pe*10.1.

**B:** The allelic combinations of these markers suggests that the alleles of both parents are acting additively on resistance since the combined positive resistance alleles (*np,ll*), combined negative alleles (*nn,lm*) and combinations of positive and negative alleles (*nn,ll* and *np,lm*) had the lowest, highest, and intermediate LSmean lesion diameters, respectively. Bars represent the standard error of the LSmean. The arrows indicate source of alleles.

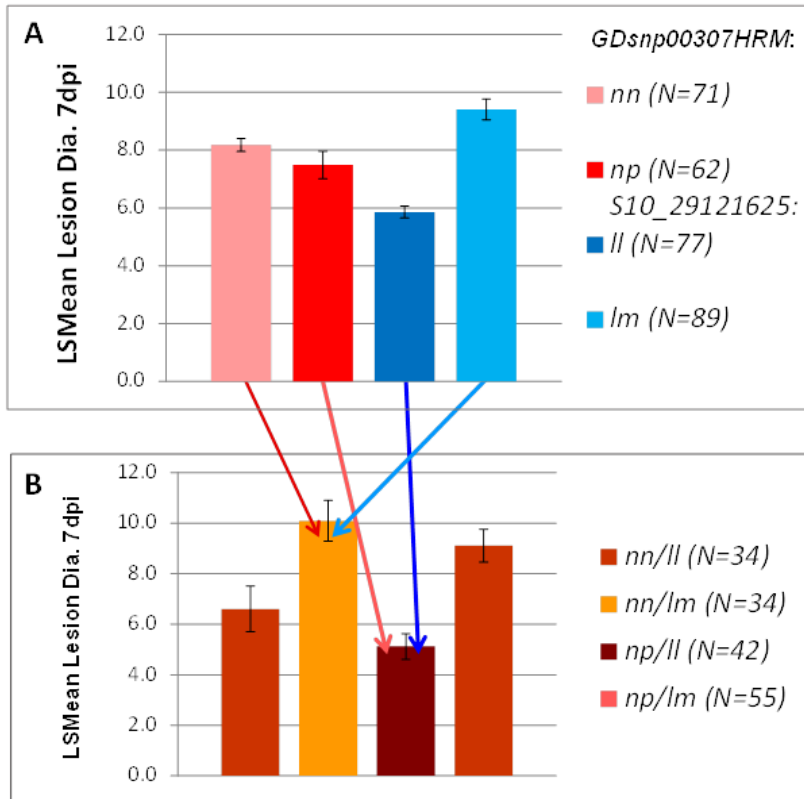

Supplement: pone.0172949.s003.pdf [file pone.0172949.s003.pdf]
