# Supplementary material for: Genotyping-by-sequencing markers facilitate the identification of quantitative trait loci controlling resistance to Penicillium expansum in Malus sieversii
Source: PubMed Central journal article supplement (PMC5336245; doi:10.1371/journal.pone.0172949), 2017-03-03
Supplement: pone.0172949.s005.pdf [file pone.0172949.s005.pdf]

**S2 Table. QTL analysis scores for Kruskal-Wallis test, interval mapping and multiple QTL modeling on LG3 and LG10.**

| Linkage Group | Position (cM) | Locus          | Source | Kruskal-Wallis |    |        | Interval Mapping (LOD) |         | Multiple QTL Model (LOD) |          |
|---------------|---------------|----------------|--------|----------------|----|--------|------------------------|---------|--------------------------|----------|
|               |               |                |        | K              | Df | P=     | All Years              | No 2012 | No 2012                  | Cofactor |
| 3             | 33.3          | S3_8859038     | RG     | 0.075          | 1  | ns     | 1.0                    | 1.0     | 0.6                      |          |
| 3             | 38.4          | S3_12615354    | Ms     | 6.262          | 1  | 0.05   | 1.8                    | 1.5     | 0.4                      |          |
| 3             | 46.4          | GD12           | Both   | 7.879          | 3  | 0.05   | 2.1                    | 2.2     | 0.2                      |          |
| 3             | 48.1          | CONS14         | Ms     | 12.6           | 1  | 0.0005 | 2.5                    | 2.8     | 0.2                      |          |
| 3             | 49.1          | GD_SNP00955    | RG     | 0.316          | 1  | ns     | 3.2                    | 3.5     | 0.2                      |          |
| 3             | 52.7          | S3_26624131    | Ms     | 14.62          | 1  | 0.0005 | 4.5                    | 5.0     | 0.9                      |          |
| 3             | 56.4          | S3_16984392    | RG     | 1.607          | 1  | ns     | 4.2                    | 4.6     | 1.1                      |          |
| 3             | 57.8          | S3_27799254    | Ms     | 13.53          | 1  | 0.0005 | 4.1                    | 4.5     | 1.0                      |          |
| 3             | 63.2          | S3_28716118    | Ms     | 24.94          | 1  | 0.0001 | 6.9                    | 7.0     | 0.6                      |          |
| 3             | 67.3          | S3_29869956    | RG     | 1.932          | 1  | ns     | 8.1                    | 8.5     | 0.7                      |          |
| 3             | 67.3          | S3_29877372    | Ms     | 29.36          | 1  | 0.0001 | 8.2                    | 8.5     | 10.0                     |          |
| 3             | 70.2          | S3_30831583    | Ms     | 38.37          | 1  | 0.0001 | 11.1                   | 11.1    | 13.3                     | X        |
| 3             | 74.7          | S3_31564599    | Ms     | 39.58          | 1  | 0.0001 | 10.4                   | 10.9    | 1.0                      |          |
| 3             | 79.7          | S3_32489041    | Ms     | 16.95          | 1  | 0.0001 | 4.2                    | 4.0     | 0.9                      |          |
| 3             | 83.7          | S3_33706967    | Ms     | 22.77          | 1  | 0.0001 | 5.6                    | 5.8     | 0.8                      |          |
| 3             | 87            | S3_34439698    | Ms     | 11.78          | 1  | 0.001  | 3.5                    | 3.8     | 1.1                      |          |
| 3             | 87            | S3_34487944    | RG     | 4.484          | 1  | 0.05   | 3.5                    | 3.8     | 1.1                      |          |
| 10            | 63.8          | S10_24274971   | Ms     | 0.012          | 1  | ns     | 3.2                    | 3.2     | 1.4                      |          |
| 10            | 66.5          | DIP47HRM       | Ms     | 0.471          | 1  | ns     | 3.2                    | 3.4     | 1.0                      |          |
| 10            | 68            | S10_28001289   | RG     | 16.74          | 1  | 0.0001 | 3.2                    | 3.5     | 0.9                      |          |
| 10            | 73.6          | GD_SNP00307HRM | Ms     | 0.657          | 1  | ns     | 4.7                    | 5.2     | 7.3                      |          |
| 10            | 73.8          | S10_29121625   | RG     | 24.16          | 1  | 0.0001 | 4.8                    | 5.2     | 7.4                      | X        |
| 10            | 81.8          | S10_31296793   | RG     | 11.85          | 1  | 0.001  | 3.4                    | 3.4     | 1.2                      |          |
| 10            | 82.8          | COL            | Both   | 20.74          | 3  | 0.0005 | 3.3                    | 3.8     | 0.2                      |          |
| 10            | 84            | DIP1HRM        | Both   | 17             | 3  | 0.001  | 3.2                    | 3.6     | 0.6                      |          |
| 10            | 86.4          | GD100          | Both   | 17.78          | 3  | 0.0005 | 3.4                    | 3.7     | 0.8                      |          |
| 10            | 86.4          | Hi22a07x_202   | Both   | 16.55          | 3  | 0.001  | 3.4                    | 3.5     | 0.9                      |          |
| 10            | 86.9          | Hi05b02        | Both   | 15             | 3  | 0.005  | 3.6                    | 3.8     | 1.7                      |          |
| 10            | 87.9          | CH02b03b_71    | RG     | 15.43          | 1  | 0.0001 | 3.5                    | 3.8     | 1.5                      |          |
| 10            | 88.8          | S10_32418226   | RG     | 13.41          | 1  | 0.0005 | 3.8                    | 3.9     | 1.0                      |          |
| 10            | 89.7          | S10_32759177   | Ms     | 2.405          | 1  | ns     | 3.8                    | 3.9     | 0.9                      |          |
| 10            | 97            | S10_33520272   | RG     | 6.098          | 1  | 0.05   | 2.3                    | 2.4     | 0.3                      |          |
| 10            | 97            | S10_33529692   | Ms     | 1.862          | 1  | 0.05   | 2.3                    | 2.4     | 0.3                      |          |
| 10            | 98.3          | MS06g03(1)     | RG     | 8.79           | 1  | 0.005  | 2.3                    | 2.8     | 0.3                      |          |
| 10            | 105.8         | S10_36760711   | RG     | 4.557          | 1  | 0.05   | 2.1                    | 2.3     | 0.5                      |          |

For “Source”: RG= marker heterozygous (informative) only in ‘Royal Gala, Ms= informative only in PI613981, and Both= informative in both parents. Mapping LOD scores for “All Years” = score calculated based on blue mold LSmean lesion diameter 7 dpi from all 4 years of study, whereas “No 2012” = blue mold data from drought year (2012) not included in calculation of LOD score. An “X” in “Cofactor” column indicates marker selected as cofactor in multiple QTL model analysis.
